# Supplementary material for: A High Rate Algal Pond Hosting a Dynamic Community of RNA Viruses
Source: Viruses. 2021 Oct 26;13(11):2163. doi: 10.3390/v13112163 (PMC8619904; doi:10.3390/v13112163)
Supplement: Supplementary file 1 [file viruses-13-02163-s001.zip]

Archive with 10 entries (10 files):
- Supplementary_figures.pdf
- __MACOSX/._Supplementary_figures.pdf
- supplementary_note_1_Primer3.txt
- __MACOSX/._supplementary_note_1_Primer3.txt
- supplementary_table_1_sequencing_stats.csv
- __MACOSX/._supplementary_table_1_sequencing_stats.csv
- supplementary_table_2.csv
- __MACOSX/._supplementary_table_2.csv
- supplementary_table_3.csv
- __MACOSX/._supplementary_table_3.csv
