# Supplementary material for: A High Rate Algal Pond Hosting a Dynamic Community of RNA Viruses
Source: Viruses. 2021 Oct 26;13(11):2163. doi: 10.3390/v13112163 (PMC8619904; doi:10.3390/v13112163)
Supplement: Supplementary file 1 [file viruses-13-02163-s001.zip › supplementary_note_1_Primer3.txt]

Supplementary Note 1 Primer3 [68] script for producing qPCR primers used to target viruses. A ?#? is a placeholder for the appropriate nucleotide position. 

primer3.bindings.designPrimers(
    {
        'SEQUENCE_ID': 'full_contig_ID',
        'SEQUENCE_TEMPLATE': abbreviated_contig_ID, 
        'SEQUENCE_INCLUDED_REGION': [#,#] 
    },
    {
        'PRIMER_OPT_SIZE': 20,
        'PRIMER_MIN_SIZE': 18, 
        'PRIMER_MAX_SIZE': 24,
        'PRIMER_OPT_TM': 63.0, 
        'PRIMER_MIN_TM': 61.0, 
        'PRIMER_MAX_TM': 65.0,
        'PRIMER_MIN_GC': 45.0, 
        'PRIMER_MAX_GC': 60.0,
        'PRIMER_MAX_POLY_X': 3, 
        'PRIMER_DNA_CONC': 100.0, 
        'PRIMER_MAX_NS_ACCEPTED': 0,
        'PRIMER_MAX_SELF_ANY': 12,
        'PRIMER_MAX_SELF_END': 3,
        'PRIMER_PAIR_MAX_COMPL_ANY': 12,
        'PRIMER_PAIR_MAX_COMPL_END': 8,
        'PRIMER_PAIR_MAX_MISPRIMING': 24,
        'PRIMER_MAX_MISPRIMING': 24,
        'PRIMER_MAX_TEMPLATE_MISPRIMING': 12, 
        'PRIMER_MAX_END_STABILITY': 9,
        'PRIMER_GC_CLAMP': 1, 
        'PRIMER_PRODUCT_SIZE_RANGE': [[#,#]], 
