# Supplementary material for: A High Rate Algal Pond Hosting a Dynamic Community of RNA Viruses
Source: Viruses. 2021 Oct 26;13(11):2163. doi: 10.3390/v13112163 (PMC8619904; doi:10.3390/v13112163)
Supplement: Supplementary file 1 [file viruses-13-02163-s001.zip › supplementary_table_1_sequencing_stats.csv]

Assembly	#_contigs_(>=0bp)	#_contigs_(>=1000bp)	#_contigs_(>=5000bp)	#_contigs_(>=10000bp)	#_contigs_(>=25000bp)	Total_length	Total_length_(>=1000bp)	Total_length_(>=5000bp)	Total_length(>=10000bp)	Total_length_(>=25000bp)	Largest_contig	Total_length	GC(%)	N50	N75	L50	L75	#total_reads	#_left	#_right	Mapped(%)	Properly_paired(%)	Avg._coverage_depth	Coverage>=1x(%)	#_N's_per_100_kbp
april	146	27	2	0	0	118036	58272	11250	0	0	5879	83888	48.33	1711	829	15	33	1442854	716796	716796	98.85	97.05	3220	100	0
may	262	34	4	0	0	193417	82424	26586	0	0	7790	129126	47.82	1503	778	20	51	1027615	509181	509181	98.17	96.18	1416	99.93	77.44
july	181	60	2	0	0	178172	107584	13767	0	0	8241	156182	46.65	1315	921	35	70	1576643	776130	776130	99.61	95.72	2242	99.87	6.4
september	320	31	2	0	0	187441	84335	18657	0	0	9891	125235	45.49	1902	798	16	42	4162472	2058445	2058445	99.41	96.93	7415	99.84	165.29
october	104	38	3	1	0	119199	82846	24048	10424	0	10424	104597	45.05	1736	1122	15	34	2026535	1004721	1004721	99.77	98.07	4327	99.93	22.95
