# Supplementary material for: A High Rate Algal Pond Hosting a Dynamic Community of RNA Viruses
Source: Viruses. 2021 Oct 26;13(11):2163. doi: 10.3390/v13112163 (PMC8619904; doi:10.3390/v13112163)
Supplement: Supplementary file 1 [file viruses-13-02163-s001.zip › supplementary_table_2.csv]

		Read counts (normalized for 1 million mapped reads)					RPKM					Percentage of the monthly read dataset
CONTIGS	length	april	may	july	september	october	RPKM APR	RPKM MAY	RPKM JUL	RPKM SEP	RPKM OCT	april	may	july	september	october
NODE_3_length_8824_cov_38530.534881	8824	0	0	26.39622674	520449.209	979793.2749	0	0	2.991412822	58981.09803	111037.3158	0	0	2.64E-05	0.520449209	0.979793275
NODE_13_length_4988_cov_14428.242754	4988	773574.4821	15.66524009	0	0	0	155087.1055	3.140585422	0	0	0	0.773574482	1.57E-05	0	0	0
NODE_2_length_9891_cov_23376.635135	9891	0	0	602113.9257	455016.5859	735.2092266	0	0	60874.9293	46003.09229	74.331132	0	0	0.602113926	0.455016586	0.000735209
NODE_15_length_4829_cov_5651.916702	4829	0	456864.3341	0	12.16269798	0	0	94608.47673	0	2.518678397	0	0	0.456864334	0	1.22E-05	0
Cellular_contigs(nodes=496)	341501	29361.28815	107447.0115	385029.7308	1226.6162	1188.788963	859.7741772	3146.325372	11274.66269	35.91848315	34.8108042	0.029361288	0.107447011	0.385029731	0.001226616	0.001188789
NODE_20_length_4128_cov_2592.086642	4128	1.415386096	162309.2931	0	0	0	0.342874539	39319.1117	0	0	0	1.42E-06	0.162309293	0	0	0
NODE_5_length_7477_cov_1286.539298	7477	1.415386096	151784.3405	0	0	0	0.189298662	20300.1659	0	0	0	1.42E-06	0.15178434	0	0	0
NODE_11_length_5259_cov_1477.997079	5259	74254.69307	0	0	0	0	14119.54612	0	0	0	0	0.074254693	0	0	0	0
NODE_119_length_1332_cov_3771.666667	1332	46331.50796	0	0	0	0	34783.41438	0	0	0	0	0.046331508	0	0	0	0
NODE_276_length_751_cov_3264.136943	751	1.415386096	44842.27192	0	0	0	1.88466857	59710.08245	0	0	0	1.42E-06	0.044842272	0	0	0
NODE_10_length_5289_cov_293.205768	5289	0	24640.37831	0	0	0	0	4658.797184	0	0	0	0	0.024640378	0	0	0
NODE_7_length_5879_cov_331.989229	5879	20106.97488	0	0	0	0	3420.135207	0	0	0	0	0.020106975	0	0	0	0
NODE_4_length_7790_cov_144.152080	7790	0.707693048	18042.17918	0	0	0	0.090846348	2316.069215	0	0	0	7.08E-07	0.018042179	0	0	0
NODE_8_length_5703_cov_127.546237	5703	1.415386096	13745.37788	0	0	0	0.248182728	2410.201277	0	0	0	1.42E-06	0.013745378	0	0	0
NODE_19_length_4317_cov_1047.318073	4317	0	0	0	13634.78986	0	0	0	0	3158.394685	0	0	0	0	0.01363479	0
NODE_39_length_2419_cov_329.471254	2419	8750.624539	2.088698678	0	0	0	3617.45537	0.863455427	0	0	0	0.008750625	2.09E-06	0	0	0
NODE_6_length_7011_cov_126.365273	7011	7221.299862	1932.046277	0	0	0	1029.995701	275.5735669	0	0	0	0.0072213	0.001932046	0	0	0
NODE_219_length_875_cov_497.242021	875	7178.602382	0	0	0	0	8204.117008	0	0	0	0	0.007178602	0	0	0	0
NODE_1_length_10424_cov_85.173672	10424	0	0	0	0	5405.335467	0	0	0	0	518.5471477	0	0	0	0	0.005405335
NODE_17_length_4628_cov_122.950943	4628	0	0	4537.032458	0	0	0	0	980.3440921	0	0	0	0	0.004537032	0	0
NODE_459_length_471_cov_9.583333	471	3904.012289	0	0	0	0	8288.773438	0	0	0	0	0.003904012	0	0	0	0
NODE_445_length_490_cov_36.959128	490	3788.115758	0	0	0	0	7730.848485	0	0	0	0	0.003788116	0	0	0	0
NODE_12_length_5122_cov_190.094619	5122	0	0	1.33651781	0	3350.342573	0	0	0.260936706	0	654.1082728	0	0	1.34E-06	0	0.003350343
NODE_56_length_1969_cov_171.496750	1969	3109.603253	0	4.009553429	0	0	1579.280474	0	2.036339984	0	0	0.003109603	0	4.01E-06	0	0
NODE_254_length_784_cov_355.676248	784	2956.741555	0	0	0	0	3771.354024	0	0	0	0	0.002956742	0	0	0	0
NODE_29_length_3122_cov_81.907302	3122	2765.664432	0	0	0	0	885.8630467	0	0	0	0	0.002765664	0	0	0	0
NODE_194_length_957_cov_288.764988	957	2471.264124	0	0	0	0	2582.30316	0	0	0	0	0.002471264	0	0	0	0
NODE_31_length_2974_cov_50.079270	2974	0	2380.072144	0	0	0	0	800.2932561	0	0	0	0	0.002380072	0	0	0
NODE_761_length_356_cov_70.862661	356	0	1720.844029	0	0	0	0	4833.831543	0	0	0	0	0.001720844	0	0	0
NODE_63_length_1879_cov_50.942483	1879	0	1553.991816	0	0	0	0	827.031302	0	0	0	0	0.001553992	0	0	0
NODE_16_length_4717_cov_101.021985	4717	0	0	0	1472.172963	0	0	0	0	312.0994198	0	0	0	0	0.001472173	0
NODE_786_length_253_cov_6.384615	253	1459.145116	0	0	0	0	5767.372001	0	0	0	0	0.001459145	0	0	0	0
NODE_54_length_2002_cov_37.995742	2002	0	1359.742839	0	0	0	0	679.1922275	0	0	0	0	0.001359743	0	0	0
NODE_778_length_274_cov_53.026490	274	1308.067815	0	0	0	0	4773.970129	0	0	0	0	0.001308068	0	0	0	0
NODE_35_length_2583_cov_45.719106	2583	1201.662796	0	0	0	0	465.2198202	0	0	0	0	0.001201663	0	0	0	0
NODE_351_length_594_cov_203.220807	594	1198.832023	0	0	0	0	2018.23573	0	0	0	0	0.001198832	0	0	0	0
NODE_787_length_252_cov_121.689922	252	0	0	0	328.7982687	1167.158332	0	0	0	1304.755034	4631.580683	0	0	0	0.000328798	0.001167158
NODE_50_length_2109_cov_32.677241	2109	0	1088.212011	0	0	0	0	515.9848323	0	0	0	0	0.001088212	0	0	0
NODE_221_length_870_cov_60.476573	870	0	1013.018859	0	0	0	0	1164.389493	0	0	0	0	0.001013019	0	0	0
NODE_26_length_3368_cov_39.601541	3368	0	0	0	0	830.0588804	0	0	0	0	246.4545369	0	0	0	0	0.000830059
NODE_431_length_497_cov_15.363636	497	0	0	0	311.4704783	784.6743661	0	0	0	626.7011636	1578.821662	0	0	0	0.00031147	0.000784674
NODE_426_length_501_cov_98.933862	501	0	0	0.668258905	323.1547768	678.9928088	0	0	1.33385011	645.0195146	1355.275067	0	0	6.68E-07	0.000323155	0.000678993
NODE_317_length_660_cov_37.210428	660	0	0	0	252.6759963	666.4191751	0	0	0	382.8424186	1009.726023	0	0	0	0.000252676	0.000666419
NODE_741_length_378_cov_17.662745	378	0	0	0	181.3944776	632.4637289	0	0	0	479.8795705	1673.184468	0	0	0	0.000181394	0.000632464
NODE_432_length_497_cov_14.847594	497	0	0	0	130.1733022	316.7295017	0	0	0	261.9181131	637.2826995	0	0	0	0.000130173	0.00031673
NODE_48_length_2160_cov_23.906726	2160	0	0	0	0	314.5067221	0	0	0	0	145.6049639	0	0	0	0	0.000314507
NODE_34_length_2651_cov_18.830696	2651	0	0	0	0	304.0563405	0	0	0	0	114.6949606	0	0	0	0	0.000304056
NODE_415_length_511_cov_38.347938	511	0	0	0	61.86759038	289.7078007	0	0	0	121.0716054	566.9428585	0	0	0	6.19E-05	0.000289708
NODE_114_length_1396_cov_30.769835	1396	0	0	0	0	273.7004702	0	0	0	0	196.0605087	0	0	0	0	0.0002737
NODE_440_length_492_cov_41.029810	492	0	0	0	242.1187744	256.5319861	0	0	0	492.1113301	521.4064759	0	0	0	0.000242119	0.000256532
NODE_450_length_487_cov_5.884615	487	0	0	0	143.2846906	253.8281572	0	0	0	294.2190773	521.2077151	0	0	0	0.000143285	0.000253828
NODE_788_length_251_cov_21.703125	251	0	0	0	121.9756438	243.4109515	0	0	0	485.9587402	969.7647469	0	0	0	0.000121976	0.000243411
NODE_21_length_3947_cov_9.237971	3947	0	0	0	0	212.9887295	0	0	0	0	53.96218128	0	0	0	0	0.000212989
NODE_436_length_496_cov_17.643432	496	0	0	0	105.8965571	187.3604128	0	0	0	213.5011231	377.7427677	0	0	0	0.000105897	0.00018736
NODE_792_length_250_cov_34.149606	250	0	0	0	69.65171709	173.3104553	0	0	0	278.6068684	693.2418212	0	0	0	6.97E-05	0.00017331
NODE_91_length_1554_cov_19.145353	1554	0	0	0	0	171.1872032	0	0	0	0	110.1590754	0	0	0	0	0.000171187
NODE_793_length_250_cov_26.645669	250	0	0	0	47.12640043	164.3032216	0	0	0	188.5056017	657.2128865	0	0	0	4.71E-05	0.000164303
NODE_158_length_1117_cov_20.305835	1117	0	0	0	0	152.7746261	0	0	0	0	136.7722704	0	0	0	0	0.000152775
NODE_76_length_1736_cov_13.470552	1736	0	0	0	0	141.3289701	0	0	0	0	81.41069703	0	0	0	0	0.000141329
NODE_94_length_1518_cov_15.133333	1518	0	0	0	0	131.3762257	0	0	0	0	86.54560322	0	0	0	0	0.000131376
NODE_43_length_2332_cov_8.910367	2332	0	0	0	0	124.4093046	0	0	0	0	53.34875841	0	0	0	0	0.000124409
NODE_731_length_380_cov_12.003891	380	0	0	0	63.9433575	122.6509864	0	0	0	168.2719934	322.7657538	0	0	0	6.39E-05	0.000122651
NODE_120_length_1324_cov_12.455454	1324	0	0	0	0	101.5179926	0	0	0	0	76.67522098	0	0	0	0	0.000101518
NODE_84_length_1660_cov_22.703969	1660	0	0	179.0933865	0	81.61250383	0	0	107.8875822	0	49.16415893	0	0	0.000179093	0	8.16E-05
NODE_45_length_2306_cov_4.191938	2306	0	0	0	0	55.73536847	0	0	0	0	24.16971746	0	0	0	0	5.57E-05
NODE_118_length_1333_cov_6.783471	1333	0	0	0	0	53.7448196	0	0	0	0	40.31869437	0	0	0	0	5.37E-05
NODE_57_length_1960_cov_2.460533	1960	0	0	0	12.6492059	52.74954516	0	0	0	6.453676478	26.91303324	0	0	0	1.26E-05	5.27E-05
NODE_240_length_816_cov_12.021645	816	0	0	0	0	51.75427072	0	0	0	0	63.42435138	0	0	0	0	5.18E-05
NODE_153_length_1140_cov_6.623402	1140	0	0	0	1.946031677	46.77789854	0	0	0	1.70704533	41.03324433	0	0	0	1.95E-06	4.68E-05
NODE_27_length_3188_cov_6.742251	3188	0	0	0	47.92103003	44.78734966	0	0	0	15.03169073	14.04872951	0	0	0	4.79E-05	4.48E-05
NODE_144_length_1170_cov_5.408787	1170	0	0	0	0	35.82987973	0	0	0	0	30.62382883	0	0	0	0	3.58E-05
NODE_151_length_1143_cov_5.248039	1143	0	0	0	0	34.83460529	0	0	0	0	30.47647007	0	0	0	0	3.48E-05
NODE_251_length_790_cov_7.103448	790	0	0	0	0	33.83933086	0	0	0	0	42.83459602	0	0	0	0	3.38E-05
NODE_112_length_1399_cov_4.011755	1399	0	0	0	0	31.84878198	0	0	0	0	22.76539098	0	0	0	0	3.18E-05
NODE_248_length_796_cov_7.245171	796	0	0	0	0	30.85350755	0	0	0	0	38.76068787	0	0	0	0	3.09E-05
NODE_103_length_1453_cov_3.555639	1453	0	0	0	0	28.86295867	0	0	0	0	19.86439	0	0	0	0	2.89E-05
NODE_199_length_941_cov_4.817848	941	0	0	0	0	26.8724098	0	0	0	0	28.5572899	0	0	0	0	2.69E-05
NODE_97_length_1499_cov_1.994186	1499	0	0	0	0	20.90076318	0	0	0	0	13.94313754	0	0	0	0	2.09E-05
NODE_281_length_742_cov_4.245557	742	0	0	0	0	18.9102143	0	0	0	0	25.48546402	0	0	0	0	1.89E-05
NODE_332_length_618_cov_2.991919	618	0	0	0	0.486507919	13.93384212	0	0	0	0.787229643	22.54667009	0	0	0	4.87E-07	1.39E-05
NODE_137_length_1197_cov_2.211359	1197	0	0	0	0	13.93384212	0	0	0	0	11.64063669	0	0	0	0	1.39E-05
NODE_113_length_1397_cov_1.632653	1397	0	0	0	0	13.93384212	0	0	0	0	9.974117479	0	0	0	0	1.39E-05
NODE_183_length_987_cov_2.278935	987	0	0	0	0	12.93856768	0	0	0	0	13.10898448	0	0	0	0	1.29E-05
NODE_72_length_1774_cov_1.842520	1774	0	0	0	2.675793555	11.94329324	0	0	0	1.508339095	6.732408818	0	0	0	2.68E-06	1.19E-05
NODE_220_length_875_cov_1.791223	875	0	0	0	0	11.94329324	0	0	0	0	13.64947799	0	0	0	0	1.19E-05
NODE_99_length_1494_cov_1.198395	1494	0	0	0	0	11.94329324	0	0	0	0	7.994172185	0	0	0	0	1.19E-05
NODE_121_length_1322_cov_1.069224	1322	0	0	0	0.973015838	9.95274437	0	0	0	0.736018032	7.52855096	0	0	0	9.73E-07	9.95E-06
NODE_591_length_421_cov_0.624161	421	0	0	0	0	9.95274437	0	0	0	0	23.64072297	0	0	0	0	9.95E-06
NODE_171_length_1039_cov_2.181223	1039	0	0	0	1.216269798	8.957469933	0	0	0	1.170615782	8.621241514	0	0	0	1.22E-06	8.96E-06
NODE_225_length_853_cov_1.815068	853	0	0	0	0	6.966921059	0	0	0	0	8.167551065	0	0	0	0	6.97E-06
NODE_154_length_1135_cov_1.049407	1135	0	0	0	0	5.971646622	0	0	0	0	5.261362662	0	0	0	0	5.97E-06
NODE_403_length_528_cov_1.145679	528	0	0	0	0	4.976372185	0	0	0	0	9.42494732	0	0	0	0	4.98E-06
NODE_568_length_431_cov_2.035714	431	0	0	0	0	3.981097748	0	0	0	0	9.236885726	0	0	0	0	3.98E-06
NODE_437_length_496_cov_1.254692	496	0	0	0	0	3.981097748	0	0	0	0	8.02640675	0	0	0	0	3.98E-06
NODE_414_length_513_cov_1.000000	513	0	0	0	0	3.981097748	0	0	0	0	7.76042446	0	0	0	0	3.98E-06
NODE_364_length_583_cov_1.593478	583	0	0	0	0	3.981097748	0	0	0	0	6.828641077	0	0	0	0	3.98E-06
NODE_350_length_595_cov_1.398305	595	0	0	0	0	3.981097748	0	0	0	0	6.690920585	0	0	0	0	3.98E-06
NODE_564_length_432_cov_1.187702	432	0	0	0	0	3.732279139	0	0	0	0	8.639535043	0	0	0	0	3.73E-06
NODE_439_length_494_cov_1.762803	494	0	0	0	0	2.985823311	0	0	0	0	6.044176743	0	0	0	0	2.99E-06
NODE_326_length_633_cov_0.994118	633	0	0	0	0	2.985823311	0	0	0	0	4.71694046	0	0	0	0	2.99E-06
NODE_321_length_649_cov_0.965779	649	0	0	0	0	2.488186092	0	0	0	0	3.833876876	0	0	0	0	2.49E-06
NODE_785_length_254_cov_3.160305	254	0	0	320.9870273	378.9248013	1.990548874	0	0	1263.728454	1491.829926	7.83680659	0	0	0.000320987	0.000378925	1.99E-06
NODE_299_length_692_cov_0.871705	692	0	0	0	0.486507919	1.990548874	0	0	0	0.703046126	2.876515714	0	0	0	4.87E-07	1.99E-06
NODE_593_length_420_cov_1.148148	420	0	0	0	0	1.990548874	0	0	0	0	4.739402081	0	0	0	0	1.99E-06
NODE_296_length_699_cov_1.404514	699	0	0	0	2.675793555	0.995274437	0	0	0	3.828030837	1.423854702	0	0	0	2.68E-06	9.95E-07
NODE_368_length_580_cov_1.111597	580	0	0	0	0.486507919	0.995274437	0	0	0	0.838806757	1.715990409	0	0	0	4.87E-07	9.95E-07
NODE_755_length_375_cov_1.015873	375	0	0	0	0	0.995274437	0	0	0	0	2.654065165	0	0	0	0	9.95E-07
NODE_705_length_390_cov_0.958801	390	0	0	0	0	0.995274437	0	0	0	0	2.551985736	0	0	0	0	9.95E-07
NODE_633_length_407_cov_0.897887	407	0	0	0	0	0.995274437	0	0	0	0	2.445391737	0	0	0	0	9.95E-07
NODE_736_length_379_cov_136.609375	379	0	0	269.709294	347.0585326	0.597164662	0	0	711.6340211	915.7217218	1.575632354	0	0	0.000269709	0.000347059	5.97E-07
NODE_107_length_1437_cov_10.862253	1437	0	0	0	50.59682359	0.497637218	0	0	0	35.21003729	0.346302866	0	0	0	5.06E-05	4.98E-07
NODE_784_length_256_cov_39.684211	256	0	0	166.0177873	183.6972818	0.199054887	0	0	648.5069815	717.567507	0.777558154	0	0	0.000166018	0.000183697	1.99E-07
NODE_23_length_3620_cov_119.295968	3620	0	0	0	1320.139239	0	0	0	0	364.6793477	0	0	0	0	0.001320139	0
NODE_14_length_4851_cov_78.821912	4851	0	0	2.67303562	1095.129326	0	0	0	0.551027751	225.7533139	0	0	0	2.67E-06	0.001095129	0
NODE_25_length_3423_cov_60.399091	3423	0	0	0	641.7039453	0	0	0	0	187.4682867	0	0	0	0	0.000641704	0
NODE_28_length_3139_cov_18.123342	3139	0	0	9.355624668	162.9801529	0	0	0	2.980447489	51.92104266	0	0	0	9.36E-06	0.00016298	0
NODE_427_length_500_cov_11.580902	500	0	0	120.7766594	141.3062251	0	0	0	241.5533188	282.6124502	0	0	0	0.000120777	0.000141306	0
NODE_562_length_432_cov_73.236246	432	0	0	84.42337498	138.411503	0	0	0	195.4244791	320.3969977	0	0	0	8.44E-05	0.000138412	0
NODE_22_length_3927_cov_10.060463	3927	0	0	0	126.0055511	0	0	0	0	32.08697506	0	0	0	0	0.000126006	0
NODE_337_length_612_cov_21.568507	612	0	0	60.4551556	120.5242285	0	0	0	98.78293398	196.9350139	0	0	0	6.05E-05	0.000120524	0
NODE_69_length_1810_cov_16.096621	1810	0	0	0	91.70674276	0	0	0	0	50.66670871	0	0	0	0	9.17E-05	0
NODE_60_length_1932_cov_13.143173	1932	0	0	0	81.49007645	0	0	0	0	42.1791286	0	0	0	0	8.15E-05	0
NODE_603_length_417_cov_1.758503	417	0	0	0	78.32777498	0	0	0	0	187.8363908	0	0	0	0	7.83E-05	0
NODE_36_length_2568_cov_8.514519	2568	0	0	0	77.35475914	0	0	0	0	30.12256976	0	0	0	0	7.74E-05	0
NODE_365_length_582_cov_5.318083	582	0	0	0	74.77626717	0	0	0	0	128.4815587	0	0	0	0	7.48E-05	0
NODE_589_length_421_cov_3.630872	421	0	0	0	73.79861792	0	0	0	0	175.2936293	0	0	0	0	7.38E-05	0
NODE_44_length_2307_cov_7.478022	2307	0	0	0	65.92182304	0	0	0	0	28.57469573	0	0	0	0	6.59E-05	0
NODE_62_length_1902_cov_11.026981	1902	0	0	15.36995481	62.75952157	0	0	0	8.080943645	32.99659388	0	0	0	1.54E-05	6.28E-05	0
NODE_776_length_281_cov_3.310127	281	0	0	0	40.77399703	0	0	0	0	145.1031923	0	0	0	0	4.08E-05	0
NODE_89_length_1595_cov_7.228261	1595	0	0	0	36.00158602	0	0	0	0	22.57152728	0	0	0	0	3.60E-05	0
NODE_418_length_511_cov_4.211340	511	0	0	0	33.56904642	0	0	0	0	65.69285014	0	0	0	0	3.36E-05	0
NODE_777_length_279_cov_7.269231	279	0	0	0	27.39039585	0	0	0	0	98.17346182	0	0	0	0	2.74E-05	0
NODE_80_length_1705_cov_4.653603	1705	0	0	0	26.75793555	0	0	0	0	15.69380384	0	0	0	0	2.68E-05	0
NODE_211_length_902_cov_9.521181	902	0	0	0	24.81190388	0	0	0	0	27.50765396	0	0	0	0	2.48E-05	0
NODE_30_length_3058_cov_2.682453	3058	0	0	0	24.81190388	0	0	0	0	8.113768436	0	0	0	0	2.48E-05	0
NODE_67_length_1827_cov_3.708920	1827	0	0	0	23.10912616	0	0	0	0	12.64867332	0	0	0	0	2.31E-05	0
NODE_349_length_595_cov_8.769068	595	0	0	0	15.32499945	0	0	0	0	25.7563016	0	0	0	0	1.53E-05	0
NODE_425_length_502_cov_2.350923	502	0	0	0	14.59523757	0	0	0	0	29.07417843	0	0	0	0	1.46E-05	0
NODE_196_length_952_cov_4.009650	952	0	0	0	11.18968214	0	0	0	0	11.75386779	0	0	0	0	1.12E-05	0
NODE_246_length_798_cov_4.528889	798	0	0	0	10.94642818	0	0	0	0	13.71732855	0	0	0	0	1.09E-05	0
NODE_703_length_390_cov_1.722846	390	0	0	0	9.730158383	0	0	0	0	24.94912406	0	0	0	0	9.73E-06	0
NODE_127_length_1277_cov_2.011265	1277	0	0	0	9.243650464	0	0	0	0	7.238567317	0	0	0	0	9.24E-06	0
NODE_515_length_447_cov_7.354938	447	0	0	0	9.243650464	0	0	0	0	20.67930752	0	0	0	0	9.24E-06	0
NODE_274_length_753_cov_3.546032	753	0	0	0	9.243650464	0	0	0	0	12.27576423	0	0	0	0	9.24E-06	0
NODE_331_length_621_cov_3.556225	621	0	0	0	7.540872747	0	0	0	0	12.14311231	0	0	0	0	7.54E-06	0
NODE_791_length_251_cov_1.250000	251	0	0	0	7.297618787	0	0	0	0	29.07417843	0	0	0	0	7.30E-06	0
NODE_324_length_640_cov_3.324952	640	0	0	0	7.297618787	0	0	0	0	11.40252935	0	0	0	0	7.30E-06	0
NODE_49_length_2127_cov_186.233533	2127	0	0	2946.353512	6.324602949	0	0	0	1385.215567	2.973485166	0	0	0	0.002946354	6.32E-06	0
NODE_750_length_376_cov_1.237154	376	0	0	8.019106859	5.83809503	0	0	0	21.32741186	15.52684848	0	0	0	8.02E-06	5.84E-06	0
NODE_723_length_382_cov_1.513514	382	0	0	0	5.83809503	0	0	0	0	15.28297128	0	0	0	0	5.84E-06	0
NODE_129_length_1257_cov_1.548501	1257	0	0	0	5.35158711	0	0	0	0	4.257428091	0	0	0	0	5.35E-06	0
NODE_574_length_429_cov_3.379085	429	0	0	0	4.865079191	0	0	0	0	11.34051094	0	0	0	0	4.87E-06	0
NODE_47_length_2163_cov_25.217647	2163	559.077508	0	0	3.892063353	0	258.4731891	0	0	1.79938204	0	0.000559078	0	0	3.89E-06	0
NODE_286_length_731_cov_1.626645	731	0	0	0	3.405555434	0	0	0	0	4.658762564	0	0	0	0	3.41E-06	0
NODE_325_length_639_cov_1.769380	639	0	0	0	2.919047515	0	0	0	0	4.568149475	0	0	0	0	2.92E-06	0
NODE_516_length_447_cov_0.895062	447	0	0	0	2.919047515	0	0	0	0	6.530307639	0	0	0	0	2.92E-06	0
NODE_336_length_613_cov_0.975510	613	0	0	0	2.919047515	0	0	0	0	4.761904592	0	0	0	0	2.92E-06	0
NODE_209_length_904_cov_0.751601	904	0	0	0	2.432539596	0	0	0	0	2.690862385	0	0	0	0	2.43E-06	0
NODE_567_length_431_cov_3.045455	431	0	0	0	2.432539596	0	0	0	0	5.643943377	0	0	0	0	2.43E-06	0
NODE_230_length_837_cov_1.550420	837	0	0	0	2.432539596	0	0	0	0	2.906259971	0	0	0	0	2.43E-06	0
NODE_333_length_618_cov_1.610101	618	0	0	0	2.432539596	0	0	0	0	3.936148213	0	0	0	0	2.43E-06	0
NODE_315_length_664_cov_1.255083	664	0	0	0	2.189285636	0	0	0	0	3.297116922	0	0	0	0	2.19E-06	0
NODE_86_length_1625_cov_18.207723	1625	0	0	218.5206619	2.108200983	0	0	0	134.4742535	1.297354451	0	0	0	0.000218521	2.11E-06	0
NODE_606_length_415_cov_1.934932	415	0	0	0	1.946031677	0	0	0	0	4.689232955	0	0	0	0	1.95E-06	0
NODE_306_length_681_cov_0.958781	681	0	0	0	1.946031677	0	0	0	0	2.857608923	0	0	0	0	1.95E-06	0
NODE_728_length_381_cov_3.732143	381	0	0	0	1.459523757	0	0	0	0	3.830771017	0	0	0	0	1.46E-06	0
NODE_497_length_454_cov_1.235650	454	0	0	0	1.459523757	0	0	0	0	3.214810038	0	0	0	0	1.46E-06	0
NODE_455_length_481_cov_1.444134	481	0	0	0	1.459523757	0	0	0	0	3.034352926	0	0	0	0	1.46E-06	0
NODE_397_length_539_cov_0.745192	539	0	0	0	1.459523757	0	0	0	0	2.707836285	0	0	0	0	1.46E-06	0
NODE_742_length_378_cov_1.498039	378	0	0	0	0.973015838	0	0	0	0	2.574115974	0	0	0	0	9.73E-07	0
NODE_370_length_573_cov_0.675556	573	0	0	0	0.973015838	0	0	0	0	1.69810792	0	0	0	0	9.73E-07	0
NODE_650_length_400_cov_3.083032	400	0	0	12.02866029	0.486507919	0	0	0	30.07165072	1.216269798	0	0	0	1.20E-05	4.87E-07	0
NODE_727_length_382_cov_0.667954	382	0	0	0	0.486507919	0	0	0	0	1.27358094	0	0	0	0	4.87E-07	0
NODE_718_length_384_cov_0.306513	384	0	0	0	0.486507919	0	0	0	0	1.266947706	0	0	0	0	4.87E-07	0
NODE_643_length_404_cov_0.911032	404	0	0	0	0.486507919	0	0	0	0	1.204227523	0	0	0	0	4.87E-07	0
NODE_73_length_1773_cov_113.612121	1773	0	0	1516.056702	0	0	0	0	855.0799223	0	0	0	0	0.001516057	0	0
NODE_161_length_1108_cov_102.325888	1108	0	0	814.0507226	0	0	0	0	734.7028183	0	0	0	0	0.000814051	0	0
NODE_115_length_1391_cov_26.966877	1391	0	0	287.4627056	0	0	0	0	206.6590263	0	0	0	0	0.000287463	0	0
NODE_181_length_1000_cov_34.051311	1000	0	0	237.2319112	0	0	0	0	237.2319112	0	0	0	0	0.000237232	0	0
NODE_92_length_1551_cov_18.974790	1551	0	0	212.5063318	0	0	0	0	137.0124641	0	0	0	0	0.000212506	0	0
NODE_90_length_1590_cov_12.580095	1590	0	0	136.3248166	0	0	0	0	85.73887836	0	0	0	0	0.000136325	0	0
NODE_150_length_1143_cov_11.600000	1143	0	0	97.56580011	0	0	0	0	85.35940517	0	0	0	0	9.76E-05	0	0
NODE_763_length_335_cov_0.778302	335	0	0	84.20062202	0	0	0	0	251.3451403	0	0	0	0	8.42E-05	0	0
NODE_38_length_2425_cov_4.120330	2425	0	0	78.85455078	0	0	0	0	32.51734053	0	0	0	0	7.89E-05	0	0
NODE_193_length_958_cov_7.820359	958	0	0	52.12419458	0	0	0	0	54.40938892	0	0	0	0	5.21E-05	0	0
NODE_74_length_1768_cov_2.245593	1768	0	0	32.07642743	0	0	0	0	18.1427757	0	0	0	0	3.21E-05	0	0
NODE_770_length_307_cov_4.043478	307	0	0	29.84889775	0	0	0	0	97.22767997	0	0	0	0	2.98E-05	0	0
NODE_79_length_1708_cov_1.868139	1708	0	0	24.05732058	0	0	0	0	14.0850823	0	0	0	0	2.41E-05	0	0
NODE_747_length_377_cov_5.267717	377	0	0	24.05732058	0	0	0	0	63.81252142	0	0	0	0	2.41E-05	0	0
NODE_145_length_1166_cov_1.813039	1166	0	0	22.72080277	0	0	0	0	19.48610872	0	0	0	0	2.27E-05	0	0
NODE_765_length_323_cov_13.080000	323	0	0	18.71124934	0	0	0	0	57.92956451	0	0	0	0	1.87E-05	0	0
NODE_338_length_608_cov_4.125773	608	0	0	17.37473153	0	0	0	0	28.57686106	0	0	0	0	1.74E-05	0	0
NODE_242_length_805_cov_2.076246	805	0	0	16.03821372	0	0	0	0	19.92324685	0	0	0	0	1.60E-05	0	0
NODE_232_length_834_cov_2.566807	834	0	0	14.70169591	0	0	0	0	17.62793274	0	0	0	0	1.47E-05	0	0
NODE_566_length_431_cov_4.678571	431	0	0	13.3651781	0	0	0	0	31.00969396	0	0	0	0	1.34E-05	0	0
NODE_665_length_396_cov_1.992674	396	0	0	13.3651781	0	0	0	0	33.75044974	0	0	0	0	1.34E-05	0	0
NODE_222_length_867_cov_2.504032	867	0	0	13.3651781	0	0	0	0	15.41543033	0	0	0	0	1.34E-05	0	0
NODE_413_length_514_cov_3.465473	514	0	0	10.69214248	0	0	0	0	20.80183362	0	0	0	0	1.07E-05	0	0
NODE_355_length_593_cov_3.278723	593	0	0	10.69214248	0	0	0	0	18.0305944	0	0	0	0	1.07E-05	0	0
NODE_198_length_945_cov_1.330900	945	0	0	10.69214248	0	0	0	0	11.31443648	0	0	0	0	1.07E-05	0	0
NODE_759_length_363_cov_9.387500	363	0	0	10.13526006	0	0	0	0	27.9208266	0	0	0	0	1.01E-05	0	0
NODE_162_length_1108_cov_0.979695	1108	0	0	9.355624668	0	0	0	0	8.443704574	0	0	0	0	9.36E-06	0	0
NODE_361_length_590_cov_2.079229	590	0	0	6.682589049	0	0	0	0	11.32642212	0	0	0	0	6.68E-06	0	0
NODE_371_length_572_cov_2.071269	572	0	0	6.682589049	0	0	0	0	11.68284799	0	0	0	0	6.68E-06	0	0
NODE_265_length_766_cov_1.101089	766	0	0	6.682589049	0	0	0	0	8.724006591	0	0	0	0	6.68E-06	0	0
NODE_205_length_912_cov_1.050697	912	0	0	6.682589049	0	0	0	0	7.327400273	0	0	0	0	6.68E-06	0	0
NODE_714_length_387_cov_1.772727	387	0	0	5.346071239	0	0	0	0	13.81413757	0	0	0	0	5.35E-06	0	0
NODE_452_length_484_cov_1.171745	484	0	0	5.346071239	0	0	0	0	11.04560173	0	0	0	0	5.35E-06	0	0
NODE_362_length_586_cov_1.915767	586	0	0	5.346071239	0	0	0	0	9.122988463	0	0	0	0	5.35E-06	0	0
NODE_339_length_605_cov_1.327801	605	0	0	5.346071239	0	0	0	0	8.836481387	0	0	0	0	5.35E-06	0	0
NODE_429_length_498_cov_0.853333	498	0	0	4.009553429	0	0	0	0	8.051312107	0	0	0	0	4.01E-06	0	0
NODE_313_length_666_cov_1.329650	666	0	0	4.009553429	0	0	0	0	6.020350494	0	0	0	0	4.01E-06	0	0
NODE_711_length_388_cov_1.328302	388	0	0	2.67303562	0	0	0	0	6.889267061	0	0	0	0	2.67E-06	0	0
NODE_626_length_409_cov_0.891608	409	0	0	2.67303562	0	0	0	0	6.535539412	0	0	0	0	2.67E-06	0	0
NODE_738_length_379_cov_0.996094	379	0	0	1.33651781	0	0	0	0	3.526432216	0	0	0	0	1.34E-06	0	0
NODE_719_length_383_cov_0.984615	383	0	0	1.33651781	0	0	0	0	3.489602636	0	0	0	0	1.34E-06	0	0
NODE_478_length_460_cov_0.759644	460	0	0	1.33651781	0	0	0	0	2.905473499	0	0	0	0	1.34E-06	0	0
NODE_783_length_258_cov_8.800000	258	0	986.3531391	0	0	0	0	3823.074182	0	0	0	0	0.000986353	0	0	0
NODE_449_length_488_cov_18.095890	488	0	947.8514601	0	0	0	0	1942.318566	0	0	0	0	0.000947851	0	0	0
NODE_96_length_1502_cov_40.036258	1502	0	935.7370078	0	0	0	0	622.9940132	0	0	0	0	0.000935737	0	0	0
NODE_767_length_320_cov_245.964467	320	0	681.6120019	0	0	0	0	2130.037506	0	0	0	0	0.000681612	0	0	0
NODE_46_length_2167_cov_18.699119	2167	0	631.8313501	0	0	0	0	291.5696124	0	0	0	0	0.000631831	0	0	0
NODE_243_length_804_cov_31.907489	804	0	526.3520669	0	0	0	0	654.6667498	0	0	0	0	0.000526352	0	0	0
NODE_794_length_250_cov_22.196850	250	0	453.5957296	0	0	0	0	1814.382918	0	0	0	0	0.000453596	0	0	0
NODE_775_length_291_cov_61.321429	291	0	367.2628509	0	0	0	0	1262.071653	0	0	0	0	0.000367263	0	0	0
NODE_238_length_824_cov_26.887304	824	0	344.6352819	0	0	0	0	418.2467013	0	0	0	0	0.000344635	0	0	0
NODE_352_length_594_cov_35.216561	594	0	308.083055	0	0	0	0	518.6583418	0	0	0	0	0.000308083	0	0	0
NODE_53_length_2041_cov_7.898853	2041	0	286.1517189	0	0	0	0	140.2017241	0	0	0	0	0.000286152	0	0	0
NODE_100_length_1492_cov_12.304602	1492	0	279.8856229	0	0	0	0	187.5909	0	0	0	0	0.000279886	0	0	0
NODE_308_length_678_cov_20.727928	678	0	258.9986361	0	0	0	0	382.003888	0	0	0	0	0.000258999	0	0	0
NODE_773_length_296_cov_50.892601	296	0	255.8655881	0	0	0	0	864.4107705	0	0	0	0	0.000255866	0	0	0
NODE_37_length_2475_cov_4.456633	2475	0	227.6681559	0	0	0	0	91.9871337	0	0	0	0	0.000227668	0	0	0
NODE_88_length_1602_cov_8.359703	1602	0	204.6924705	0	0	0	0	127.7730777	0	0	0	0	0.000204692	0	0	0
NODE_77_length_1733_cov_7.144720	1733	0	198.4263744	0	0	0	0	114.4987735	0	0	0	0	0.000198426	0	0	0
NODE_510_length_451_cov_9.765244	451	0	158.7410995	0	0	0	0	351.9758304	0	0	0	0	0.000158741	0	0	0
NODE_335_length_613_cov_12.993878	613	0	139.9428114	0	0	0	0	228.2916989	0	0	0	0	0.000139943	0	0	0
NODE_300_length_689_cov_13.491166	689	0	133.6767154	0	0	0	0	194.0155521	0	0	0	0	0.000133677	0	0	0
NODE_226_length_844_cov_7.617198	844	0	127.4106194	0	0	0	0	150.9604495	0	0	0	0	0.000127411	0	0	0
NODE_356_length_592_cov_12.046908	592	0	119.0558246	0	0	0	0	201.1078119	0	0	0	0	0.000119056	0	0	0
NODE_271_length_754_cov_5.690967	754	0	79.37054977	0	0	0	0	105.2659811	0	0	0	0	7.94E-05	0	0	0
NODE_249_length_792_cov_3.911809	792	0	62.66096034	0	0	0	0	79.11737417	0	0	0	0	6.27E-05	0	0	0
NODE_555_length_434_cov_6.951768	434	0	60.57226166	0	0	0	0	139.5674232	0	0	0	0	6.06E-05	0	0	0
NODE_649_length_400_cov_10.714801	400	0	52.21746695	0	0	0	0	130.5436674	0	0	0	0	5.22E-05	0	0	0
NODE_316_length_662_cov_1.404453	662	0	50.12876827	0	0	0	0	75.72321491	0	0	0	0	5.01E-05	0	0	0
NODE_441_length_492_cov_6.471545	492	0	43.86267224	0	0	0	0	89.15177284	0	0	0	0	4.39E-05	0	0	0
NODE_133_length_1225_cov_2.639746	1225	0	40.72962422	0	0	0	0	33.24867283	0	0	0	0	4.07E-05	0	0	0
NODE_552_length_436_cov_4.872204	436	0	37.59657621	0	0	0	0	86.23067937	0	0	0	0	3.76E-05	0	0	0
NODE_732_length_380_cov_1.120623	380	0	34.46352819	0	0	0	0	90.69349523	0	0	0	0	3.45E-05	0	0	0
NODE_598_length_418_cov_3.413559	418	0	31.33048017	0	0	0	0	74.95330184	0	0	0	0	3.13E-05	0	0	0
NODE_399_length_535_cov_2.099515	535	0	27.15308281	0	0	0	0	50.75342582	0	0	0	0	2.72E-05	0	0	0
NODE_646_length_403_cov_2.710714	403	0	25.06438414	0	0	0	0	62.19450158	0	0	0	0	2.51E-05	0	0	0
NODE_457_length_475_cov_2.730114	475	0	22.97568546	0	0	0	0	48.36986412	0	0	0	0	2.30E-05	0	0	0
NODE_420_length_507_cov_1.716146	507	0	20.88698678	0	0	0	0	41.19721259	0	0	0	0	2.09E-05	0	0	0
NODE_458_length_475_cov_0.661932	475	0	16.70958942	0	0	0	0	35.178083	0	0	0	0	1.67E-05	0	0	0
NODE_186_length_983_cov_1.139535	983	0	16.70958942	0	0	0	0	16.99856503	0	0	0	0	1.67E-05	0	0	0
NODE_446_length_489_cov_1.767760	489	0	10.44349339	0	0	0	0	21.3568372	0	0	0	0	1.04E-05	0	0	0
NODE_268_length_761_cov_1.266458	761	0	10.44349339	0	0	0	0	13.72338159	0	0	0	0	1.04E-05	0	0	0
NODE_165_length_1085_cov_1.246362	1085	0	10.44349339	0	0	0	0	9.62533953	0	0	0	0	1.04E-05	0	0	0
NODE_505_length_452_cov_1.139818	452	0	5.221746695	0	0	0	0	11.55253694	0	0	0	0	5.22E-06	0	0	0
NODE_696_length_391_cov_1.708955	391	0	4.177397356	0	0	0	0	10.68388071	0	0	0	0	4.18E-06	0	0	0
NODE_599_length_418_cov_1.206780	418	0	4.177397356	0	0	0	0	9.993773579	0	0	0	0	4.18E-06	0	0	0
NODE_277_length_750_cov_50.357257	750	460.0004812	3.341917885	0	0	0	613.333975	4.455890513	0	0	0	0.00046	3.34E-06	0	0	0
NODE_528_length_443_cov_1.190625	443	1.415386096	2.088698678	0	0	0	3.195002474	4.714895436	0	0	0	1.42E-06	2.09E-06	0	0	0
NODE_744_length_378_cov_1.000000	378	0	2.088698678	0	0	0	0	5.525657878	0	0	0	0	2.09E-06	0	0	0
NODE_698_length_391_cov_0.947761	391	0	2.088698678	0	0	0	0	5.341940353	0	0	0	0	2.09E-06	0	0	0
NODE_687_length_393_cov_0.674074	393	0	2.088698678	0	0	0	0	5.314754906	0	0	0	0	2.09E-06	0	0	0
NODE_673_length_395_cov_0.871324	395	0	2.088698678	0	0	0	0	5.287844755	0	0	0	0	2.09E-06	0	0	0
NODE_660_length_399_cov_0.923913	399	0	2.088698678	0	0	0	0	5.23483378	0	0	0	0	2.09E-06	0	0	0
NODE_534_length_442_cov_0.796238	442	0	2.088698678	0	0	0	0	4.72556262	0	0	0	0	2.09E-06	0	0	0
NODE_304_length_683_cov_166.651786	683	1036.062622	0	0	0	0	1516.929169	0	0	0	0	0.001036063	0	0	0	0
NODE_104_length_1447_cov_63.973565	1447	829.4162523	0	0	0	0	573.1971336	0	0	0	0	0.000829416	0	0	0	0
NODE_551_length_436_cov_130.645367	436	798.2777582	0	0	0	0	1830.912289	0	0	0	0	0.000798278	0	0	0	0
NODE_570_length_430_cov_186.502712	430	772.8008085	0	0	0	0	1797.211182	0	0	0	0	0.000772801	0	0	0	0
NODE_772_length_303_cov_0.666667	303	764.2697373	0	0	0	0	2522.342367	0	0	0	0	0.00076427	0	0	0	0
NODE_284_length_734_cov_102.415712	734	700.6161176	0	0	0	0	954.5178713	0	0	0	0	0.000700616	0	0	0	0
NODE_428_length_500_cov_9.045093	500	622.085779	0	0	0	0	1244.171558	0	0	0	0	0.000622086	0	0	0	0
NODE_259_length_775_cov_74.162577	775	527.9390138	0	0	0	0	681.2116308	0	0	0	0	0.000527939	0	0	0	0
NODE_597_length_418_cov_65.474576	418	416.1235123	0	0	0	0	995.5107949	0	0	0	0	0.000416124	0	0	0	0
NODE_216_length_888_cov_22.052288	888	225.0463893	0	0	0	0	253.4306186	0	0	0	0	0.000225046	0	0	0	0
NODE_412_length_515_cov_31.655612	515	220.800231	0	0	0	0	428.7383126	0	0	0	0	0.0002208	0	0	0	0
NODE_790_length_251_cov_13.937500	251	213.3930438	0	0	0	0	850.1714891	0	0	0	0	0.000213393	0	0	0	0
NODE_753_length_375_cov_46.297619	375	205.2309839	0	0	0	0	547.2826238	0	0	0	0	0.000205231	0	0	0	0
NODE_376_length_562_cov_23.125285	562	147.200154	0	0	0	0	261.9219822	0	0	0	0	0.0001472	0	0	0	0
NODE_659_length_399_cov_18.456522	399	126.6770556	0	0	0	0	317.4863549	0	0	0	0	0.000126677	0	0	0	0
NODE_78_length_1711_cov_5.244332	1711	97.66164063	0	0	0	0	57.07869119	0	0	0	0	9.77E-05	0	0	0	0
NODE_166_length_1054_cov_6.602578	1054	75.01546309	0	0	0	0	71.17216612	0	0	0	0	7.50E-05	0	0	0	0
NODE_51_length_2105_cov_3.857719	2105	75.01546309	0	0	0	0	35.63679957	0	0	0	0	7.50E-05	0	0	0	0
NODE_234_length_829_cov_5.620397	829	58.03082994	0	0	0	0	70.00100113	0	0	0	0	5.80E-05	0	0	0	0
NODE_108_length_1432_cov_2.907563	1432	36.8000385	0	0	0	0	25.69835091	0	0	0	0	3.68E-05	0	0	0	0
NODE_314_length_665_cov_4.575646	665	25.47694973	0	0	0	0	38.3112026	0	0	0	0	2.55E-05	0	0	0	0
NODE_563_length_432_cov_3.915858	432	18.40001925	0	0	0	0	42.59263715	0	0	0	0	1.84E-05	0	0	0	0
NODE_720_length_382_cov_3.814672	382	14.15386096	0	0	0	0	37.05199204	0	0	0	0	1.42E-05	0	0	0	0
NODE_423_length_505_cov_0.549738	505	8.492316577	0	0	0	0	16.81646847	0	0	0	0	8.49E-06	0	0	0	0
NODE_278_length_747_cov_1.136218	747	6.369237432	0	0	0	0	8.526422266	0	0	0	0	6.37E-06	0	0	0	0
NODE_514_length_448_cov_1.326154	448	2.830772192	0	0	0	0	6.318687929	0	0	0	0	2.83E-06	0	0	0	0
NODE_438_length_495_cov_0.572581	495	2.123079144	0	0	0	0	4.289048776	0	0	0	0	2.12E-06	0	0	0	0
NODE_729_length_381_cov_0.976744	381	1.415386096	0	0	0	0	3.714924137	0	0	0	0	1.42E-06	0	0	0	0
NODE_664_length_397_cov_0.930657	397	1.415386096	0	0	0	0	3.565204272	0	0	0	0	1.42E-06	0	0	0	0
NODE_628_length_409_cov_0.888112	409	1.415386096	0	0	0	0	3.460601702	0	0	0	0	1.42E-06	0	0	0	0
