# Supplementary material for: A High Rate Algal Pond Hosting a Dynamic Community of RNA Viruses
Source: Viruses. 2021 Oct 26;13(11):2163. doi: 10.3390/v13112163 (PMC8619904; doi:10.3390/v13112163)
Supplement: Supplementary file 1 [file viruses-13-02163-s001.zip › supplementary_table_3.csv]

rna_viral_target_ID	amplicon_length	origin_contig_length(bp)	primer_forward_name	primer_forward_sequence	primer_reverse_name	primer_reverse_sequence	associated_taxonomy_target_interest	host_info	reference_target_interest(GenBank)	"best_hit"_title	evalue	similarity(%)	query_coverage(%)	putatitive_protein_target
1	132	2587	PALAECN36AL	TGCAGACCCTAAGCAGGAGC	PALAECN36AR	ACGTCTGTCTGGCTCCACAC	Picornavirales_Marnaviridae	Aurantiochytrium	YP_398835	capsid protein precursor [Aurantiochytrium single-stranded RNA virus 01]	2.00E-114	41	94	capsid_precursor
2	120	1322	PALAECN118AL	GGAAGGGCGACAAATCTGCC	PALAECN118AR	CCACGCTTTCACCTCGCTTG	Picornavirales_Marnaviridae	Aurantiochytrium	YP_392465	polyprotein [Aurantiochytrium single-stranded RNA virus 01]	6.00E-87	39	89	polyprotein
3	108	10424	PALAECN2CL	TCGCTGAAGAGCAAGTAGCA	PALAECN32CR	CTGCGGACCCTATAGCTGAG	Picornavirales_Marnaviridae	Cylindrotheca_closterium	BBO15696	capsid proteins [Cylindrotheca closterium RNA virus]	0.00E+00	84	65	capisid_precursor
4	108	8824	PALAECN3EL	AGTACCGCCACTTGCCCATC	PALAECN3ER	TGCGACCTTCCTCATAGCGG	Picornavirales_Marnaviridae	Aurantiochytrium	YP_398835	capsid protein precursor [Aurantiochytrium single-stranded RNA virus 01]	8.00E-100	38	34	capisid_precursor
5	113	8214	PALAECN4BL	GTGACAGGCGCTCCCAAATC	PALAECN4BR	GCTGACGTTGTTAGTGGGCC	Picornavirales_Marnaviridae	unknown	QJI53802	hypothetical protein 2 [Marnaviridae sp.]	1.00E-89	29	31	hypotheical
6	149	4867	PALAECN13BL	GAACGGGAAGGTGCCGAAAC	PALAECN13BR	CTTGCTGACGCCTTGTGACG	Beihai_noda_like_virus	unknown	KX883043	Beihai noda-like virus 7 strain BHWZXX2233 hypothetical protein gene, partial cds	2.00E-46	28	42	hypotheical
7	101	2306	PALAECRN42CL	GCTCGGCTGGGTCATGTTTG	PALAECRN42CR	AGTGCTGACCCTAAGCGGAG	Birnaviridae	rotifera	D3GMG2	Rotifer birnavirus strain Palavas segment A, genomic RNA	0.00E+00	98	99	polyprotein
